# Supplementary material
Source: PubMed Central journal article supplement (PMC2613699)

**Fig. S1**

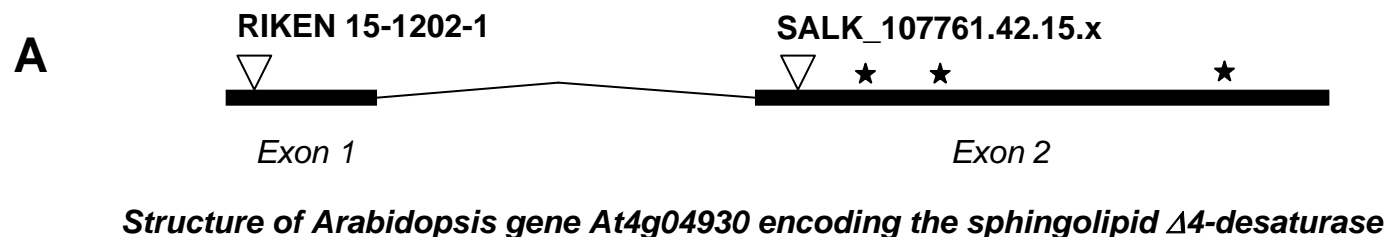

**B**

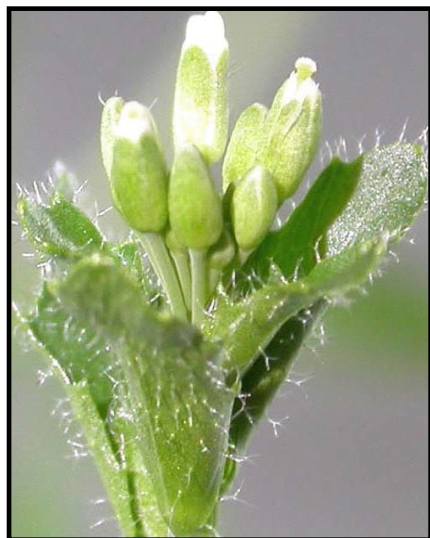

**C**

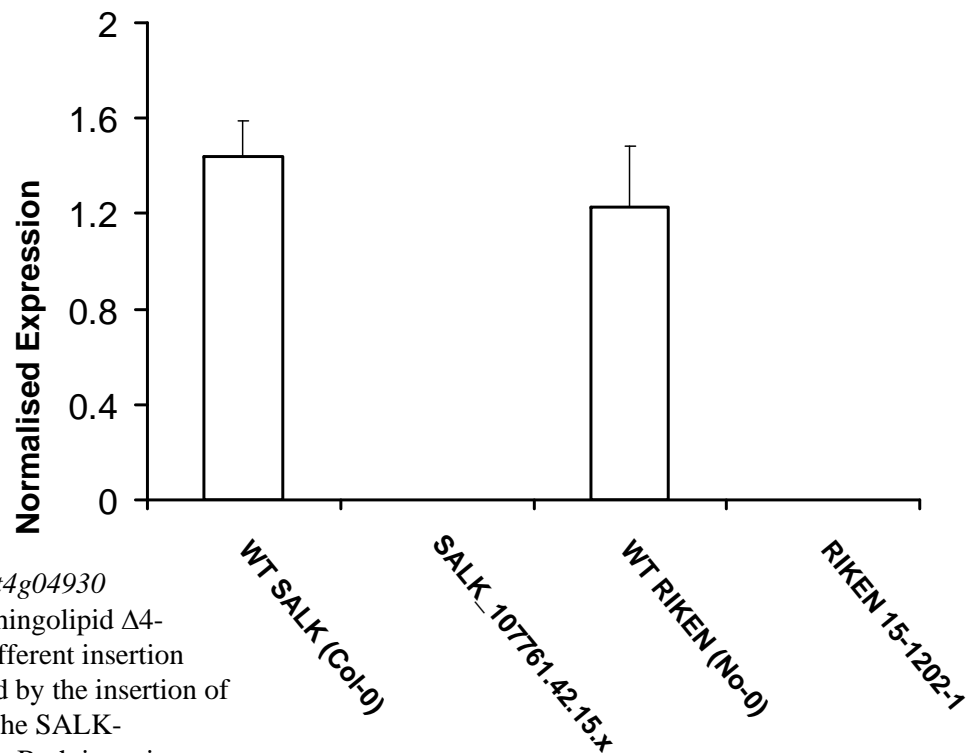

**Figure S2** Identification of insertion mutants for Arabidopsis gene At4g04930

**A.** Genomic structure of Arabidopsis gene At4g04930 encoding the sphingolipid  $\Delta$ 4-desaturase. The position of the single intron is shown, as are the two different insertion alleles described in the text. The RIKEN 15-1202-1 mutant is generated by the insertion of modified *Ds*-transposon shortly after the start of the coding sequence. The SALK-107761.42.15.x mutant results from the insertion of a modified T-DNA. Both insertions are predicted to disrupt the ORF of this gene, not least of all with respect to the critical histidine boxes required from desaturase function (indicated by solid stars).

**B.** Stage of floral development at which RNA was isolated for detection of transcripts derived from At4g04930.

**C.** Q-PCR was used to detect transcripts from WT (Col-0, No-0) and insertion mutants. Expression was normalised as described in Griffiths et al. (2006).

Fig. S2

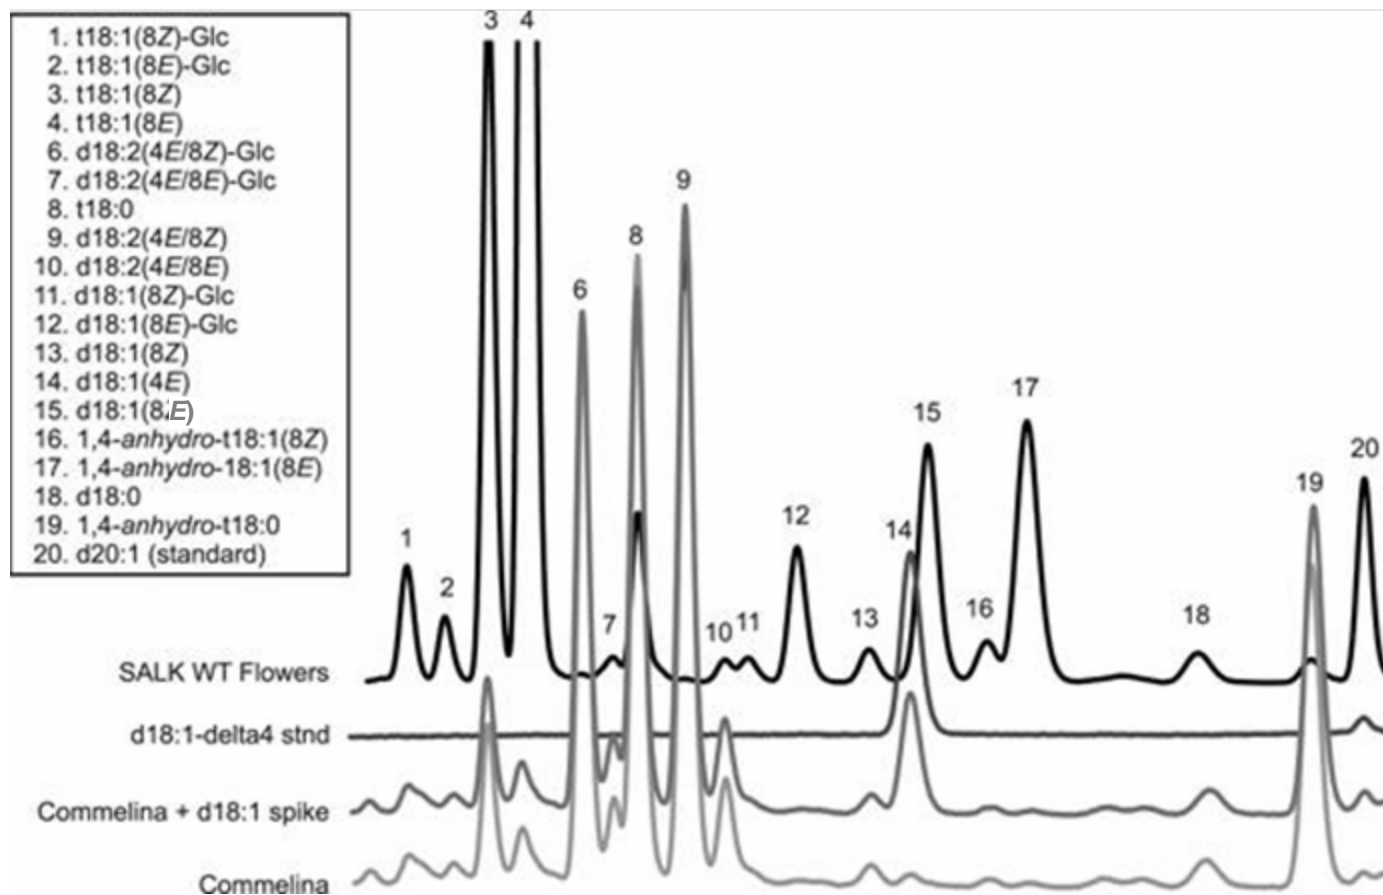

**Fig. S2** HPLC separation and identification of plant LCBs.

LCBs were prepared by hydrolysis and *o*-phthalaldehyde derivitization as previously described (Markham et al. 2006). Identification of the d18:1(4*E*) LCB was confirmed in extracts from *Commelina* by spiking with synthetic d18:1(4*E*) and comparing retention times with the synthetic standard alone. The *Arabidopsis* sample contained no detectable amounts of d18:1(4*E*) and only minor amounts of d18:2(4*E*/8*Z*). LCB nomenclature and peak identification labels are described in Markham et al. 2006.

Fig S3

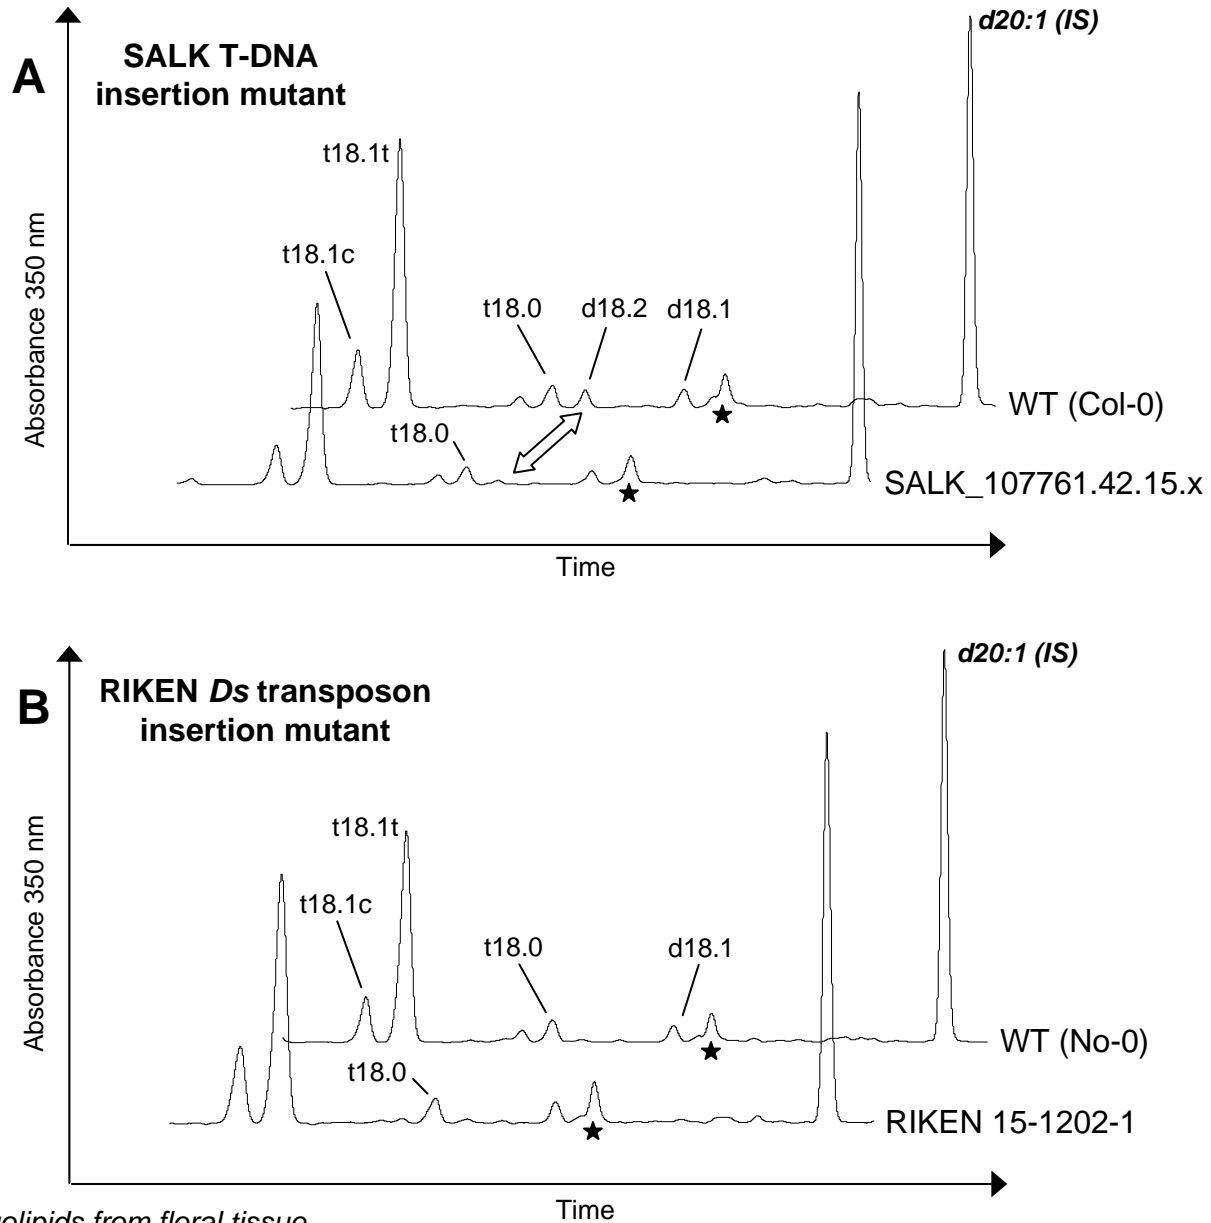

*LCB analysis of sphingolipids from floral tissue.*

Total LCBs were extracted from developing flowers (Fig 3B) and analysed by highly resolving HPLC). T-DNA insertion mutant SALK\_107761.42.15 lacked any detectable  $\Delta^4$ -unsaturated LCBs compared with the WT Col-0 (the position of  $\Delta^4$ -unsaturated sphinga-4,8-diene is indicated with an open arrow). The No-0 ecotype naturally lacks this LCB (compare WT No-0 with insertion mutant RIKEN 15-1202-1). No d18:1 $\Delta^4$  LCBs were identified in any samples, though low levels of d18:1 $\Delta^8$  are detectable (cf. Table S2). Anhydro-LCBs are indicated with a star (see also Fig S2).

Fig. S4

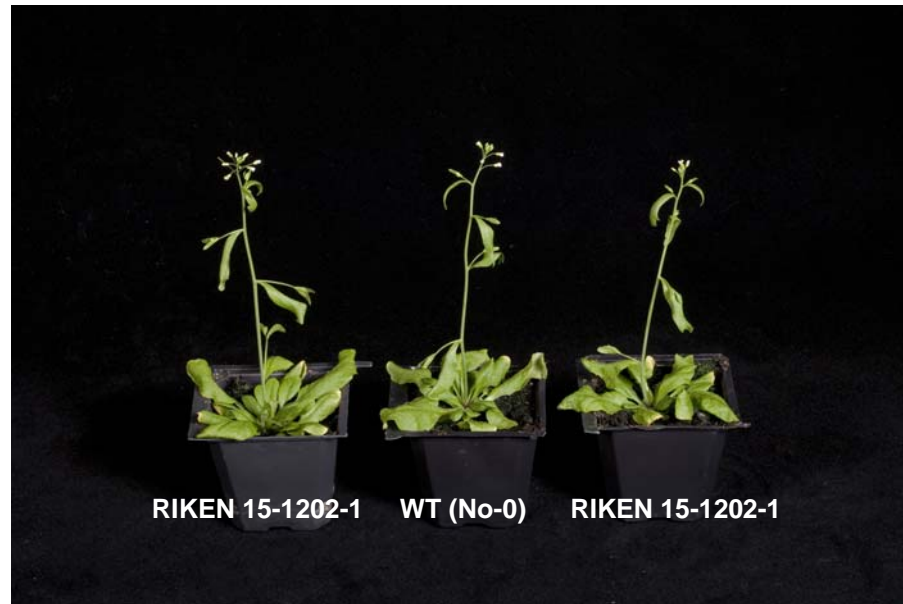

RIKEN *Ds*  
transposon mutant

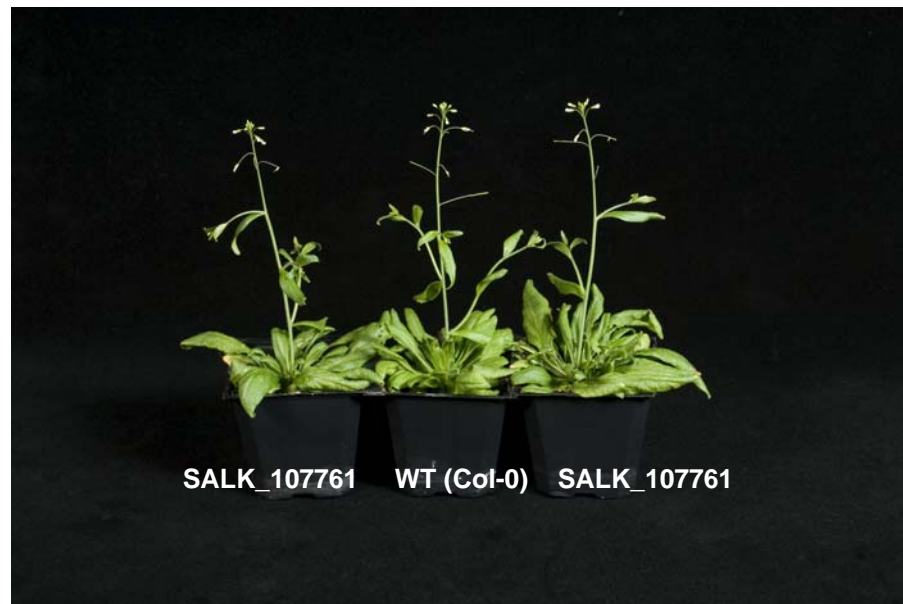

SALK T-DNA  
insertion mutant

Insertional mutagenesis of sphingolipid  $\Delta$ 4-desaturase At4g04930 does not result in any gross phenotypic alteration

Table S1 *Microarray-derived tissue-specific expression of At4g04930*

| <b>Tissue</b>                                | <b>Expression Level</b> | <b>Standard Deviation</b> |
|----------------------------------------------|-------------------------|---------------------------|
| Dry seed                                     | 4.68                    | 3.15                      |
| Imbibed seed, 24 h                           | 3.7                     | 3.18                      |
| 1st Node                                     | 3.7                     | 1.81                      |
| Flower Stage 12, Stamens                     | 1018.9                  | 23.36                     |
| Cauline Leaf                                 | 5.71                    | 1.39                      |
| Cotyledon                                    | 7.5                     | 0.42                      |
| Root                                         | 4.66                    | 1.05                      |
| Entire Rosette After Transition to Flowering | 6.36                    | 2                         |
| Flower Stage 9                               | 5.58                    | 1.64                      |
| Flower Stage 10/11                           | 8.68                    | 2.51                      |
| Flower Stage 12                              | 120.35                  | 7.43                      |
| Flower Stage 15                              | 227.5                   | 3.37                      |
| Flower Stage 12, Carpels                     | 6.18                    | 1.36                      |
| Flower Stage 12, Petals                      | 40.38                   | 4.63                      |
| Flower Stage 12, Sepals                      | 26.13                   | 0.94                      |
| Flower Stage 15, Carpels                     | 55.68                   | 8.92                      |
| Flower Stage 15, Petals                      | 55.61                   | 4.78                      |
| Flower Stage 15, Sepals                      | 49.66                   | 4.9                       |
| Flower Stage 15, Stamen                      | 1225.5                  | 34.03                     |
| Flowers Stage 15, Pedicels                   | 9.35                    | 1.61                      |
| Leaf 1 + 2                                   | 6.33                    | 1.5                       |
| Leaf 7, Petiole                              | 6.81                    | 4                         |
| Leaf 7, Distal Half                          | 7.4                     | 2.19                      |
| Leaf 7, Proximal Half                        | 8.73                    | 2.48                      |
| Hypocotyl                                    | 4.03                    | 0.45                      |
| Root                                         | 5.33                    | 1.69                      |
| Rosette Leaf 2                               | 7.06                    | 0.61                      |
| Rosette Leaf 4                               | 6.25                    | 0.56                      |
| Rosette Leaf 6                               | 11.45                   | 1.47                      |
| Rosette Leaf 8                               | 6.65                    | 0.31                      |
| Rosette Leaf 10                              | 9.25                    | 1.24                      |
| Rosette Leaf 12                              | 6.08                    | 1.55                      |
| Senescing Leaf                               | 5.05                    | 1.76                      |
| Shoot Apex, Inflorescence                    | 4.9                     | 1.82                      |
| Shoot Apex, Transition                       | 3.28                    | 0.42                      |
| Shoot Apex, Vegetative                       | 3.01                    | 3.45                      |
| Stem, 2nd Internode                          | 7.26                    | 3.24                      |
| Mature Pollen                                | 6802.68                 | 239.51                    |
| Seeds Stage 3 w/ Siliques                    | 256.36                  | 0.51                      |
| Seeds Stage 4 w/ Siliques                    | 25.4                    | 2.02                      |
| Seeds Stage 5 w/ Siliques                    | 24.06                   | 1.65                      |
| Seeds Stage 6 w/o Siliques                   | 9.21                    | 2.21                      |
| Seeds Stage 7 w/o Siliques                   | 10.91                   | 1.88                      |
| Seeds Stage 8 w/o Siliques                   | 11.98                   | 3.03                      |
| Seeds Stage 9 w/o Siliques                   | 13.73                   | 2                         |
| Seeds Stage 10 w/o Siliques                  | 8.6                     | 2.19                      |
| Vegetative Rosette                           | 5.01                    | 3.13                      |

Data extracted from Arabidopsis eFP browser at [bar.utoronto.ca](http://bar.utoronto.ca)

Table S2

| nmol g dw <sup>-1</sup> | Col-0<br>Floral | SALK_107781<br>Floral | Col-0<br>Leaf | SALK_107781<br>Leaf | No-0<br>Floral | RIKEN 15-<br>1202-1<br>Floral | No-0<br>Leaf | RIKEN 15-<br>1202-1<br>Leaf |
|-------------------------|-----------------|-----------------------|---------------|---------------------|----------------|-------------------------------|--------------|-----------------------------|
| <b>t18:1(Z)</b>         | 292             | 309                   | 204           | 216                 | 290            | 283                           | 237          | 254                         |
| <b>t18:1(E)</b>         | 970             | 978                   | 601           | 639                 | 919            | 888                           | 743          | 829                         |
| <b>t18:0</b>            | 77              | 81                    | 121           | 115                 | 95             | 88                            | 104          | 127                         |
| <b>d18:2(E/Z)</b>       | 4               | 0                     | 0             | 0                   | 0              | 0                             | 0            | 0                           |
| <b>d18:2(E/E)</b>       | 19              | 0                     | 0             | 0                   | 0              | 0                             | 0            | 0                           |
| <b>d18:1(Z)</b>         | 26              | 26                    | 18            | 17                  | 28             | 22                            | 11           | 16                          |
| <b>d18:1(E)</b>         | 186             | 200                   | 111           | 110                 | 172            | 159                           | 72           | 92                          |
| <b>d18:0</b>            | 19              | 22                    | 31            | 26                  | 23             | 21                            | 13           | 19                          |
| <b>TOTAL</b>            | 1594            | 1615                  | 1087          | 1124                | 1527           | 1461                          | 1180         | 1337                        |
| <b>mol%</b>             |                 |                       |               |                     |                |                               |              |                             |
| <b>t18:1(Z)</b>         | 18              | 19                    | 19            | 19                  | 19             | 19                            | 20           | 19                          |
| <b>t18:1(E)</b>         | 61              | 61                    | 55            | 57                  | 60             | 61                            | 63           | 62                          |
| <b>t18:0</b>            | 5               | 5                     | 11            | 10                  | 6              | 6                             | 9            | 9                           |
| <b>d18:2(E/Z)</b>       | 0               | 0                     | 0             | 0                   | 0              | 0                             | 0            | 0                           |
| <b>d18:2(E/E)</b>       | 1               | 0                     | 0             | 0                   | 0              | 0                             | 0            | 0                           |
| <b>d18:1(Z)</b>         | 2               | 2                     | 2             | 2                   | 2              | 2                             | 1            | 1                           |
| <b>d18:1(E)</b>         | 12              | 12                    | 10            | 10                  | 11             | 11                            | 6            | 7                           |
| <b>d18:0</b>            | 1               | 1                     | 3             | 2                   | 2              | 1                             | 1            | 1                           |
| <b>TOTAL</b>            | 100%            | 100%                  | 100%          | 100%                | 100%           | 100%                          | 100%         | 100%                        |

Table S2. LCB analysis of wild-type and sphingolipid  $\Delta 4$ -desaturase mutants.

Tissue from each genotype was hydrolyzed in the presence of 1nmol synthetic d20:1 internal standard and the LCB content measured by *o*-phthalaldehyde derivatization, HPLC separation and fluorescence detection as previously described (Markham et al. 2006).  $\Delta 4$ -desaturated LCBs were only detected in Col-0 sample derived from floral tissues, and then only as d18:2 species. No d18:2 was detected in samples from the SALK mutant line and no d18:2 was detectable in leaf tissue or any of the samples in the No-0 background.

### Table S3

*PCR Primers used to generate the P. pastoris sphingolipid  $\Delta 4$ -desaturase knockout strain and to express the sphingolipid  $\Delta 4$ -desaturase gene of A. thaliana in P. pastoris.*

| Primer Name      | Sequence (5' → 3')                           |
|------------------|----------------------------------------------|
| Delta4-F-EcoRI   | <u>GGAATTC</u> CAGTTCAGATCTTAGATACACATG      |
| Delta4-R-HindIII | CCATGGGA <u>AAGCTT</u> GTACTCTTCACCATACTGCCC |
| Delta4-Test-F    | ATCTCCTGCGACGTCTTAATG                        |
| Delta4-Test-R    | GTCGCCTTTGGTAACCTGAAG                        |
| Zeo-F-XbaI       | GCTCTAGACACACACCATAGCTTCAAAATG               |
| Zeo-R-XmnI       | <u>GAACAAATTC</u> CCAGCTTGCAAATTAAGCCTTC     |
| Zeo-int-F        | CGGCATAGTATATCGGCAT                          |
| Zeo-int-R        | ATGCCGATATACTATGCCG                          |
| d4At-F           | <u>GAATTC</u> ATTATGGGGAAAGGAGGACGTGAG       |
| d4At-R           | <u>GCGGCCGCTT</u> AGTCAGACTTTGAGAGCTTCC      |

# Supplementary Data 1: Spingolipid analysis

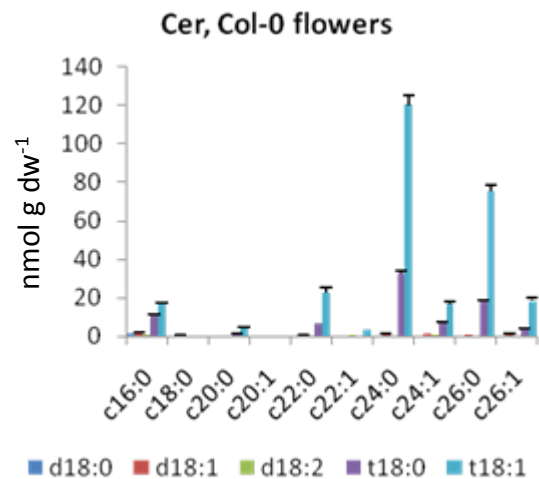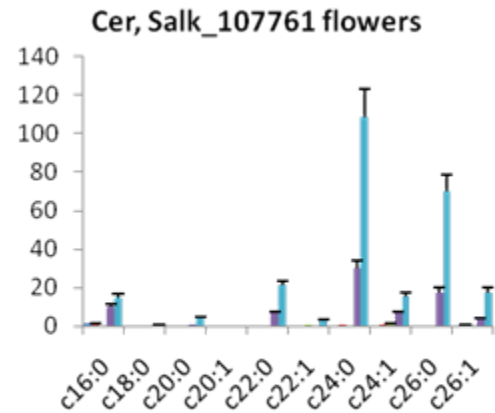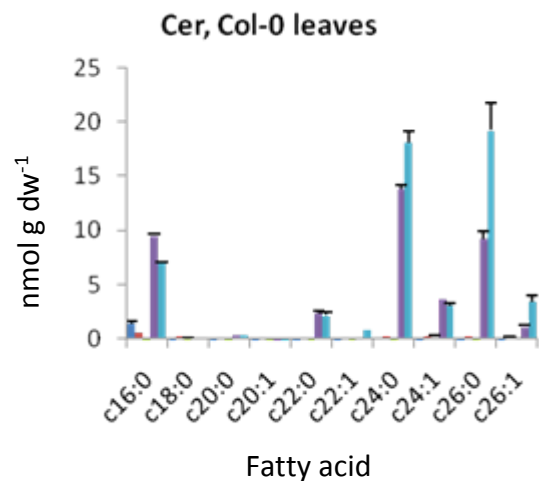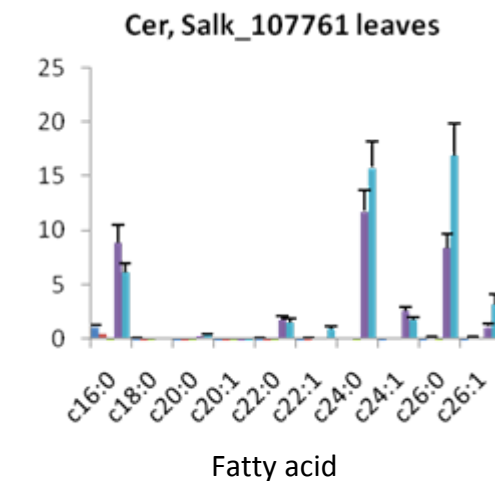



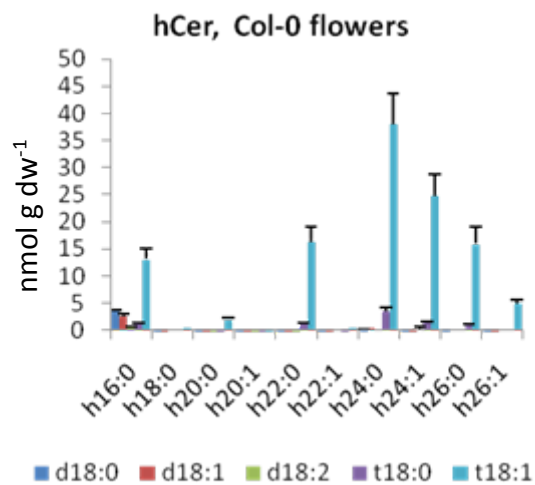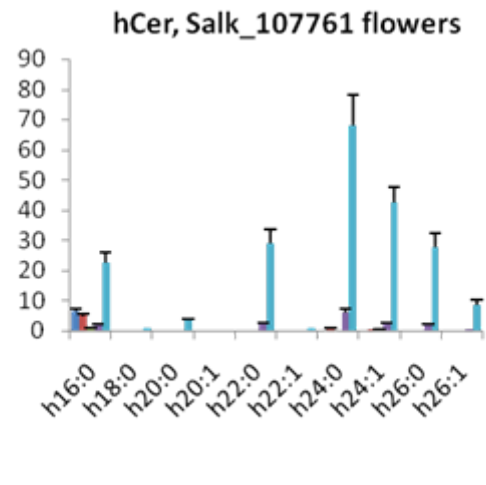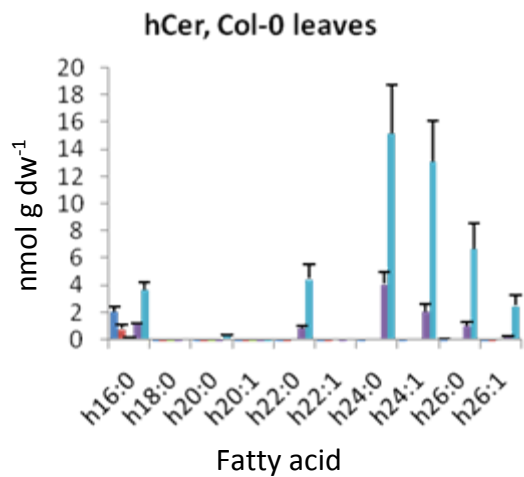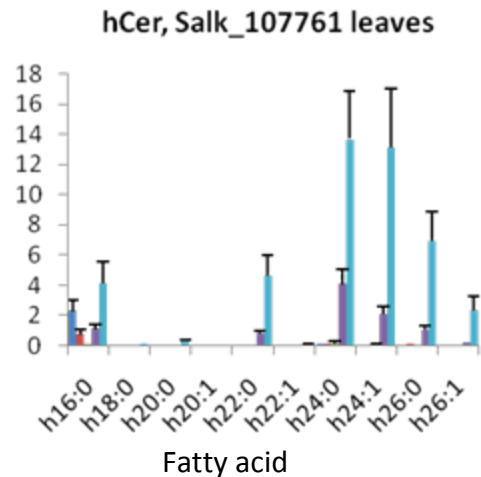

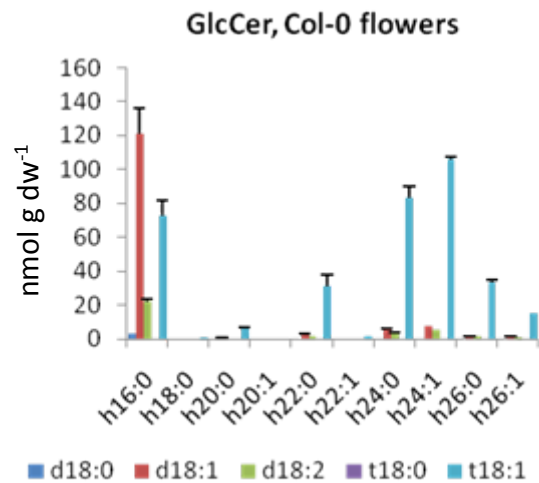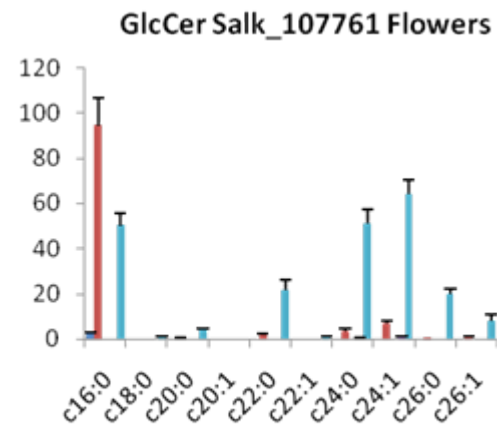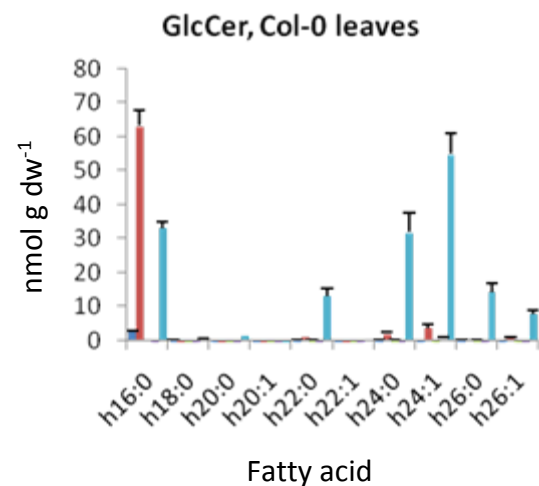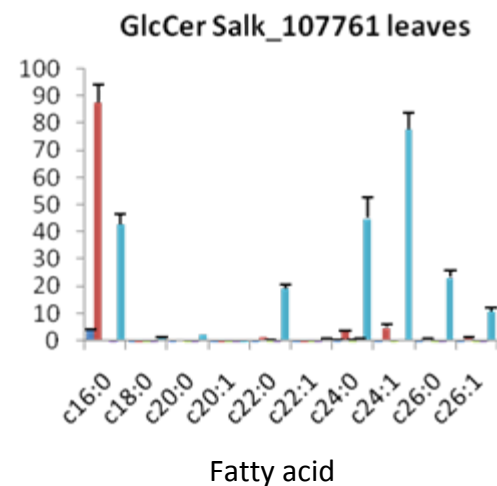

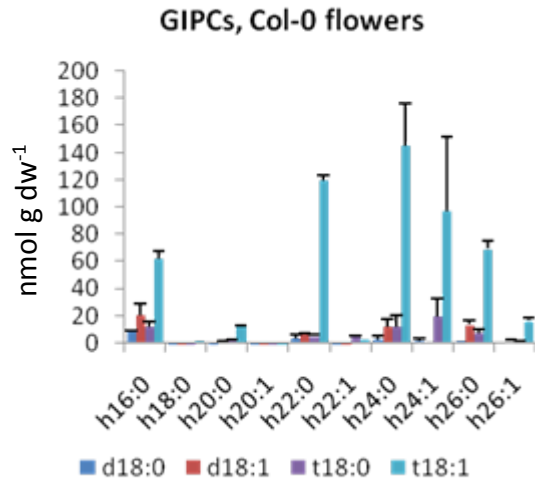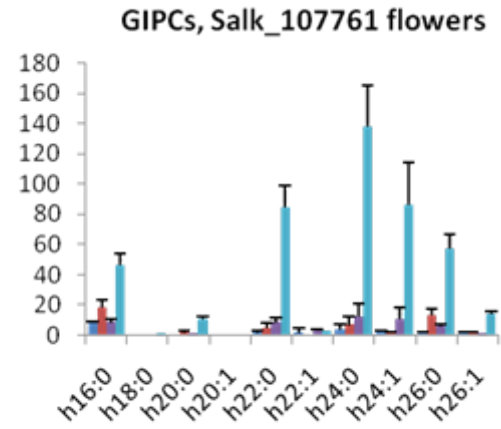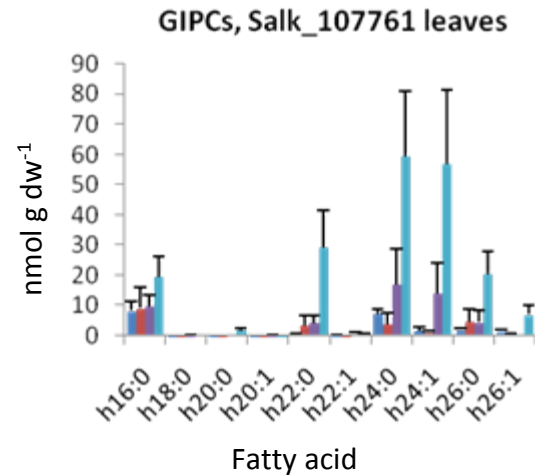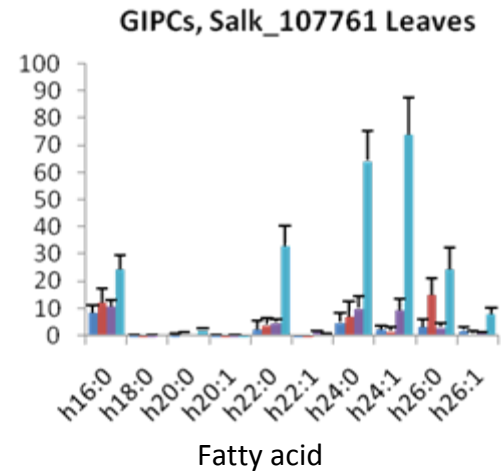

**Cer, No-0 flowers**

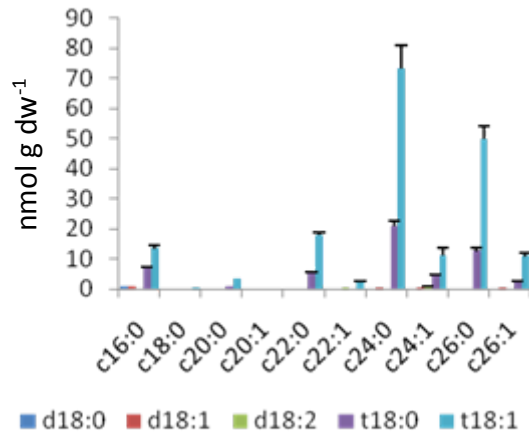

**Cer, Riken 15-1202-1 flowers**

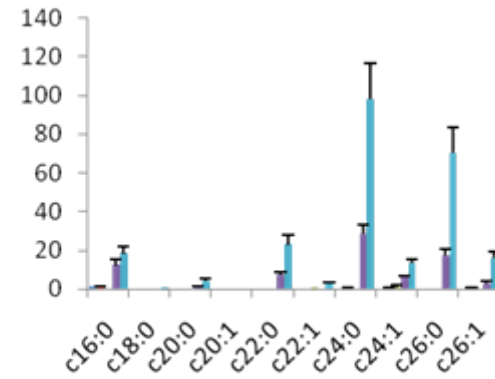

**Cer, No-0 leaves**

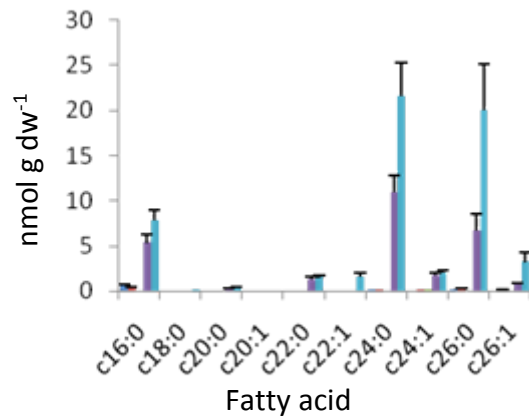

**Cer, Riken 15-1202-1 leaves**

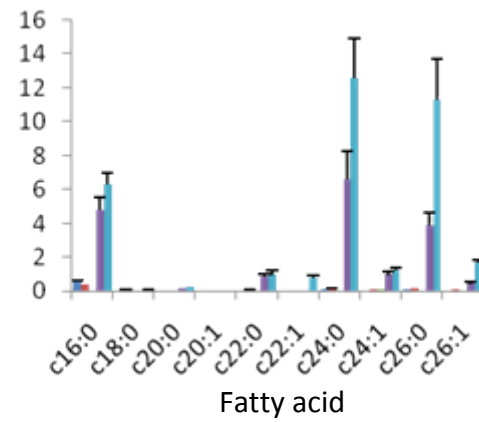

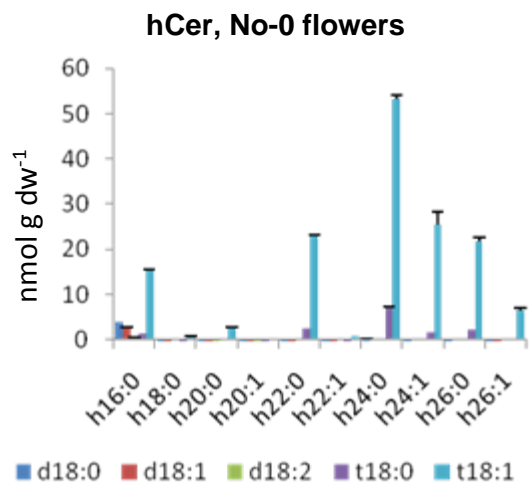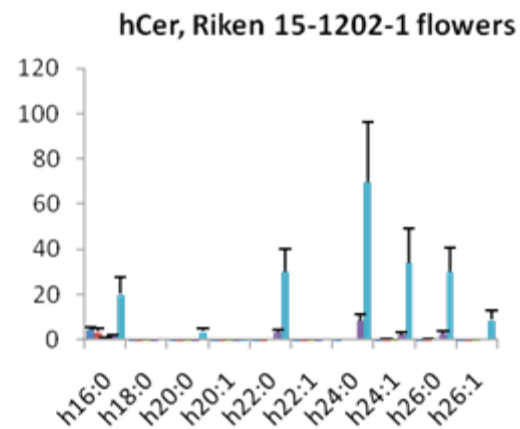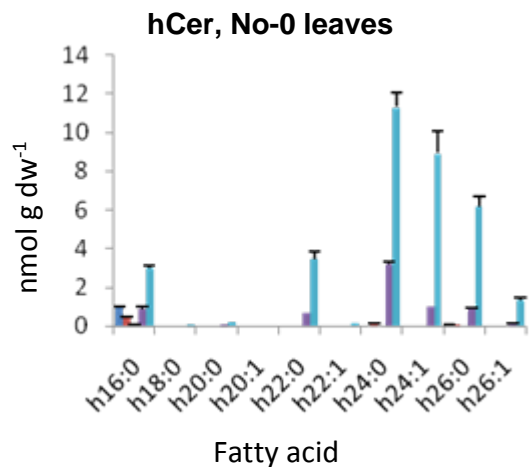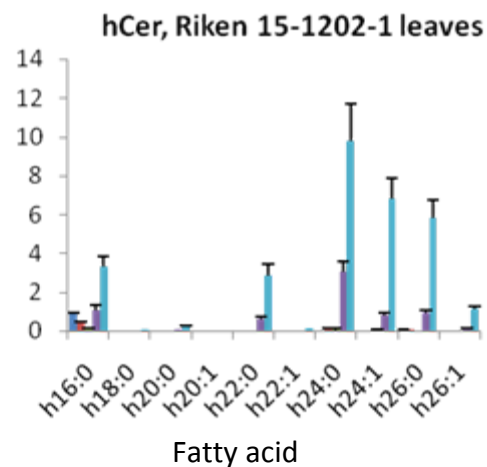

**GlcCer, No-0 flowers**

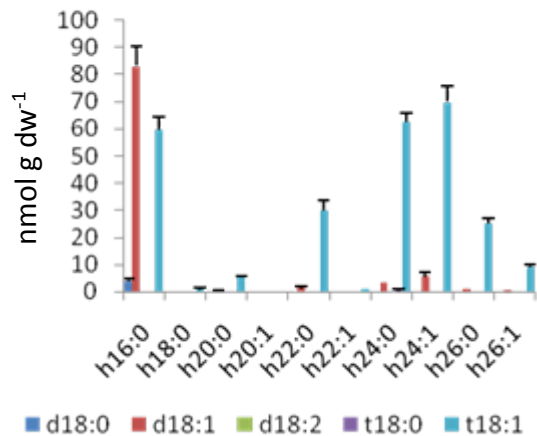

**GlcCer, Riken 15-1202-1 flowers**

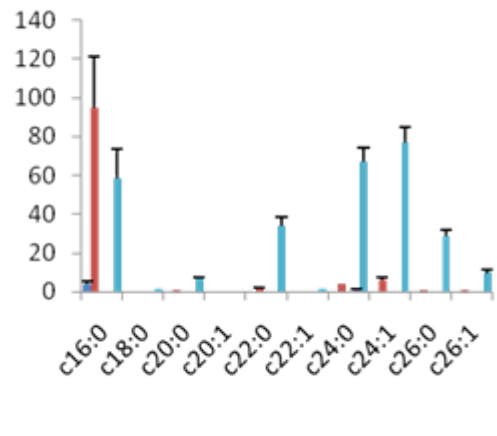

**GlcCer, No-0 leaves**

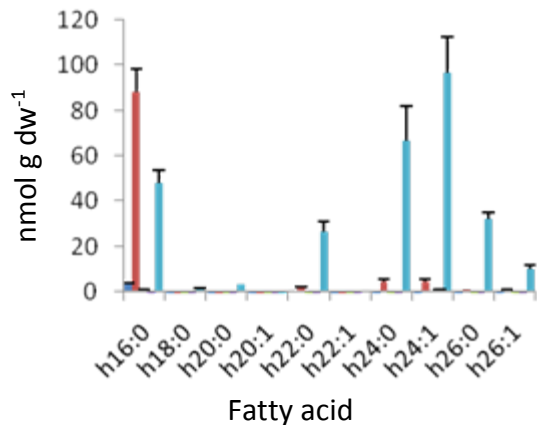

**GluCer, Riken 15-1202-1 leaves**

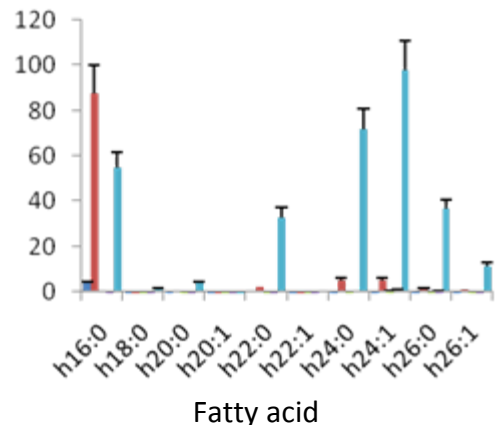

**GIPCs, No-0 flowers**

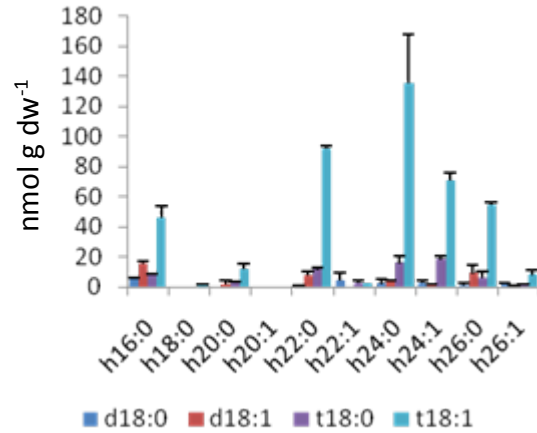

**GIPCs, Riken 15-1202-1 flowers**

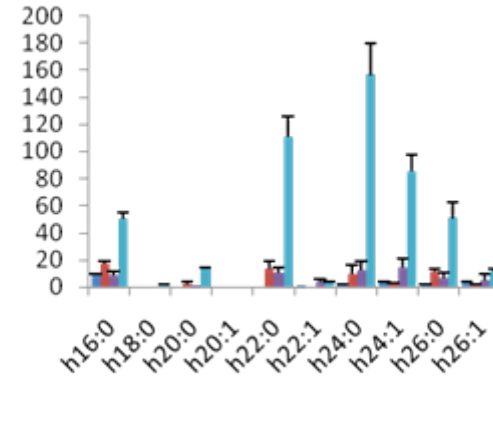

**GIPCs, No-0 leaves**

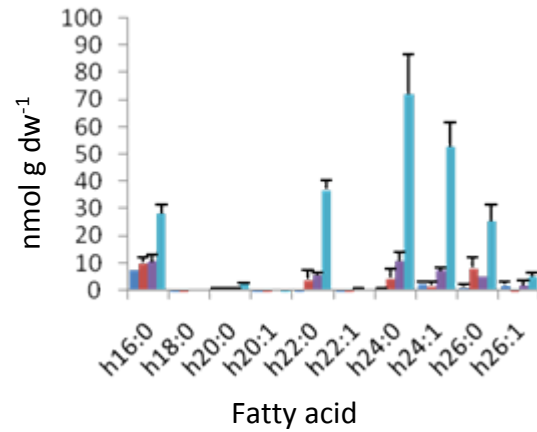

**GIPCs, Riken 15-1202-1 leaves**

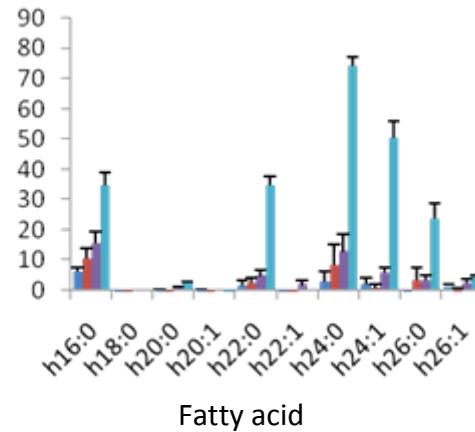

Supplementary Data 2: Free LCB and LCB-1-P analysis

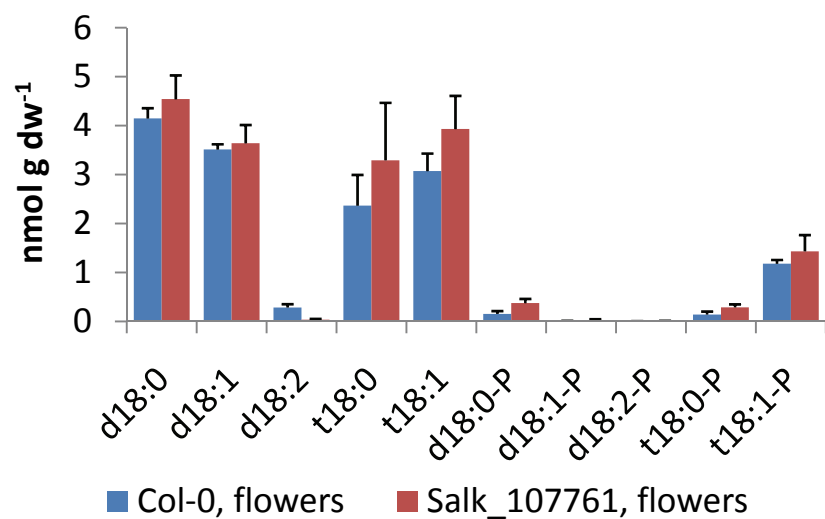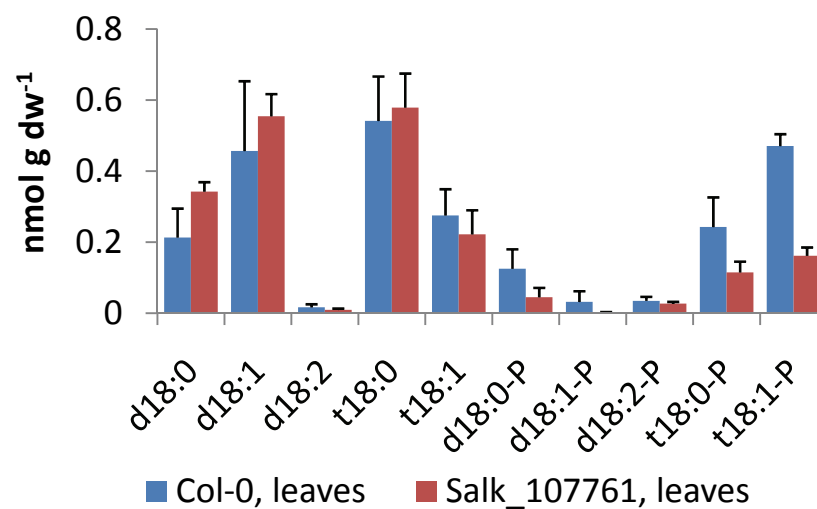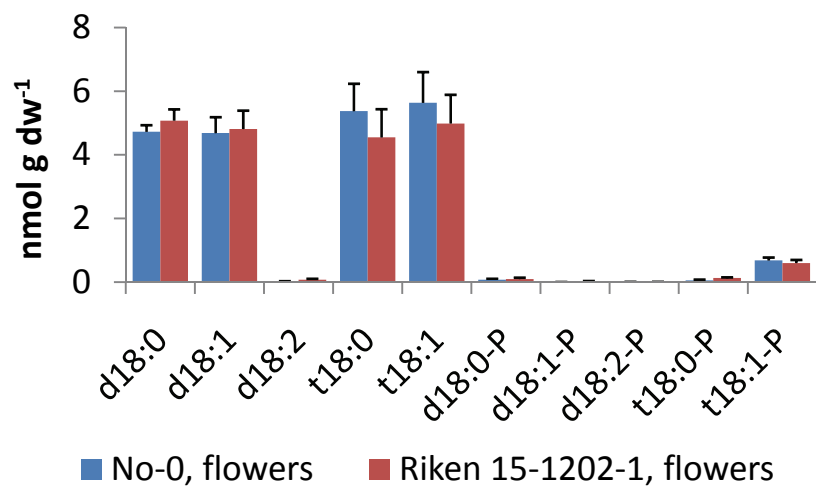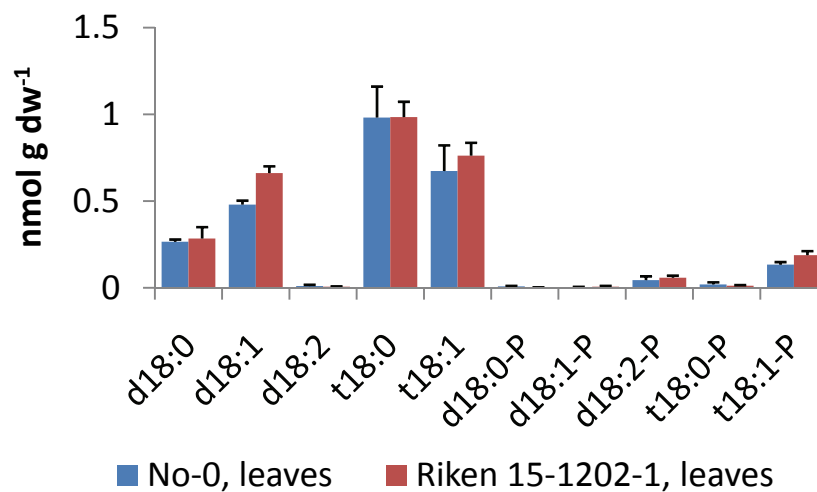

Supplement: pp.108.129411_1.pdf [file pp.108.129411_1.pdf]
